# Supplementary material for: A novel naphthalene-based fluorescent probe for highly selective detection of cysteine with a large Stokes shift and its application in bioimaging
Source: Royal Society of Chemistry journal article supplement (doi:10.1039/c8nj04425b), 2018-01-01
Supplement: c8nj04425b1.pdf [file c8nj04425b1.pdf]

*Supplementary Data*

*For*

**A novel naphthalene-based fluorescent probe for highly selective detection of cysteine with large Stokes shift and its application in bioimaging**

Wang Zhang<sup>a</sup>, Xinye Zhao<sup>a</sup>, Weijing Gu<sup>a</sup>, Tian Cheng<sup>a</sup>, Bingxiang Wang<sup>a,b\*</sup>, Yuliang Jiang<sup>a,b\*</sup>, Jian Shen<sup>a,b\*</sup>

<sup>a</sup> College of Chemistry and Materials Science, Nanjing Normal University,  
Nanjing, 210023, P. R. China

<sup>b</sup> Jiangsu Collaborative Innovation Center of Biomedical Functional Materials and Jiangsu  
Key Laboratory of Biofunctional Materials

\*Corresponding author: Fax: +86-25-85891767; Tel: +86-25-85891705

E-mail address: zhangwang94520@163.com

**Content**

- 1. Table S1.** The comparison between probe **BTNA** and some similar probes
- 2. Figure S1.** <sup>1</sup>H NMR (400 MHz) spectrum of compound **BNO** in DMSO-*d*<sub>6</sub>.
- 3. Figure S2.** <sup>13</sup>C NMR (100 MHz) spectrum of compound **BNO** in DMSO-*d*<sub>6</sub>.
- 4. Figure S3.** <sup>1</sup>H NMR (400 MHz) spectrum of probe **BTNA** in DMSO-*d*<sub>6</sub>.
- 5. Figure S4.** <sup>13</sup>C NMR (100 MHz) spectrum of probe **BTNA** in DMSO-*d*<sub>6</sub>.
- 6. Figure S5.** HRMS (ESI<sup>+</sup>) spectrum of probe **BTNA**.
- 7. Figure S6.** Fluorescence spectra of **BTNA** by itself (10 μM, black line), and **BTNA** (10 μM) in the presence of Cys (1 mM, green line).
- 8. Figure S7.** Time-depended experiments.
- 9. Figure S8.** Emission color changes of probe **BTNA** with various analytes.
- 10. Figure S9.** TLC analysis
- 11. Figure S10.** <sup>1</sup>H NMR spectrum analysis of product **A** with the reference compound **BNO**.
- 12. Figure S11.** Absorbance spectra and fluorescent spectra analysis.
- 13. Figure S12.** The color of solid compound **BNO** under room light and UV light.

**14. Figure S13.** Fluorescence changes in test paper of **BTNA** with various analytes under 365 nm

**15. Figure S14.** Cell viability to Hela cells of probe **BTNA**.

|          | <b>Probe</b>                                                                                                | <b>Solvent (pH=7.4)</b>                          | <b>Dose of Cys (eq.)</b> | <b>Time (min)</b> | <b>Stokes shift (nm)</b> | <b>Analyte</b>    | <b>Detection Limit (<math>\mu\text{M}</math>)</b> | <b>Reference</b> |
|----------|-------------------------------------------------------------------------------------------------------------|--------------------------------------------------|--------------------------|-------------------|--------------------------|-------------------|---------------------------------------------------|------------------|
| <b>1</b> | 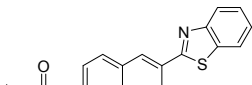<br>(Ex=365nm,Em=505nm)    | DMSO-PBS<br>(1/1,v/v)                            | 10                       | 9                 | 140                      | Cys               | 0.18                                              | <b>This work</b> |
| <b>2</b> | <br>(Ex=333nm,Em=450 nm)   | DMSO-PBS<br>(1/9,v/v)                            | 10                       | 30                | 117                      | Cys<br>Hcy<br>GSH | 0.80                                              | [1]              |
| <b>3</b> | <br>(Ex=450nm,Em=520 nm)  | EtOH-water<br>(2/3, v/v)                         | 14.5                     | 60                | 70                       | Cys<br>Hcy        | 0.50                                              | [2]              |
| <b>4</b> | <br>(Ex=452nm,Em=547 nm) | DMSO-PBS<br>(containing<br>0.2% DMSO)            | 20                       | 7                 | 95                       | Cys<br>Hcy        | 1.8                                               | [3]              |
| <b>5</b> | <br>(Ex=503nm,Em=525 nm) | CH <sub>3</sub> CN-H <sub>2</sub> O<br>(1:1,v/v) | 50                       | 150               | 22                       | Cys               | 0.037                                             | [4]              |
| <b>6</b> | <br>(Ex=380nm,Em=490 nm) | H <sub>2</sub> O-CH <sub>3</sub> OH<br>(1/9,v/v) | 30                       | 180               | 110                      | Cys<br>Hcy<br>GSH | 0.68                                              | [5]              |

|           |                                                                                                             |                                     |    |            |     |                   |         |      |
|-----------|-------------------------------------------------------------------------------------------------------------|-------------------------------------|----|------------|-----|-------------------|---------|------|
| <b>7</b>  | 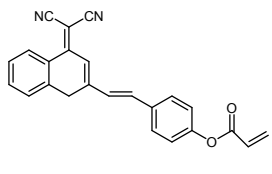<br>(Ex=560nm,Em=676 nm)   | DMSO-PBS<br>(1/1,v/v)               | 5  | 20         | 116 | Cys<br>Hcy        | 0.081   | [6]  |
| <b>8</b>  | <br>(Ex=585nm,Em=635 nm)   | DMSO-PBS<br>(1/1,v/v)               | 10 | 30         | 50  | Cys<br>Hcy        | 0.3     | [7]  |
| <b>9</b>  | <br>(Ex=370nm,Em=474 nm)   | EtOH-PBS<br>(3/7, v/v)              | 10 | no<br>data | 104 | GSH               | 0.082   | [8]  |
| <b>10</b> | <br>(Ex=377nm,Em=487 nm)  | EtOH-H <sub>2</sub> O<br>(2:8, v/v) | 1  | 40         | 110 | Cys<br>Hcy        | no data | [9]  |
| <b>11</b> | <br>(Ex=420nm,Em=454 nm) | EtOH-HEPES<br>(2:8, v/v)            | 15 | 40         | 34  | Cys<br>GSH        | 0.657   | [10] |
| <b>12</b> | <br>(Ex=458nm,Em=498 nm) | DMSO-PBS<br>(1/1,v/v)               | 5  | 15         | 40  | Cys<br>Hcy<br>GSH | 0.02    | [11] |

**Table S1.** The comparison between probe **BTNA** and some similar probes

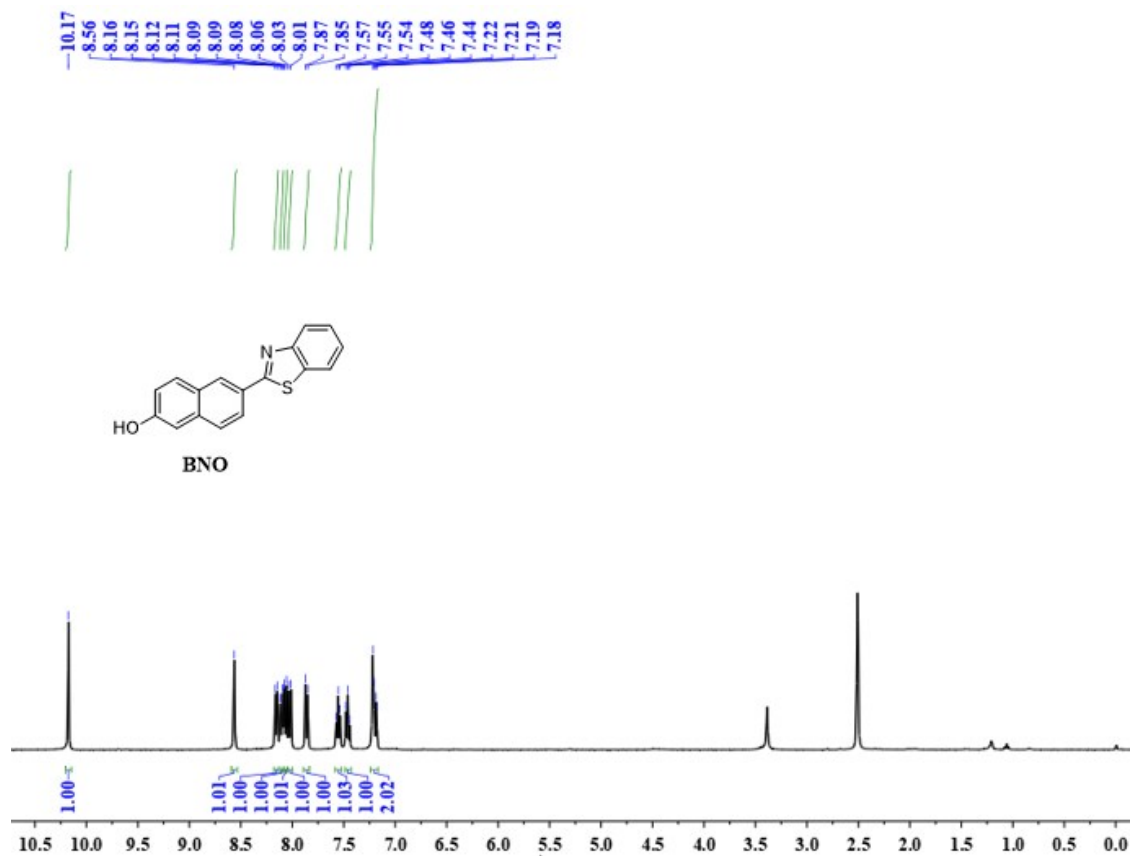

Figure S1. <sup>1</sup>H NMR (400 MHz) spectrum of compound **BNO** in DMSO-*d*<sub>6</sub>.

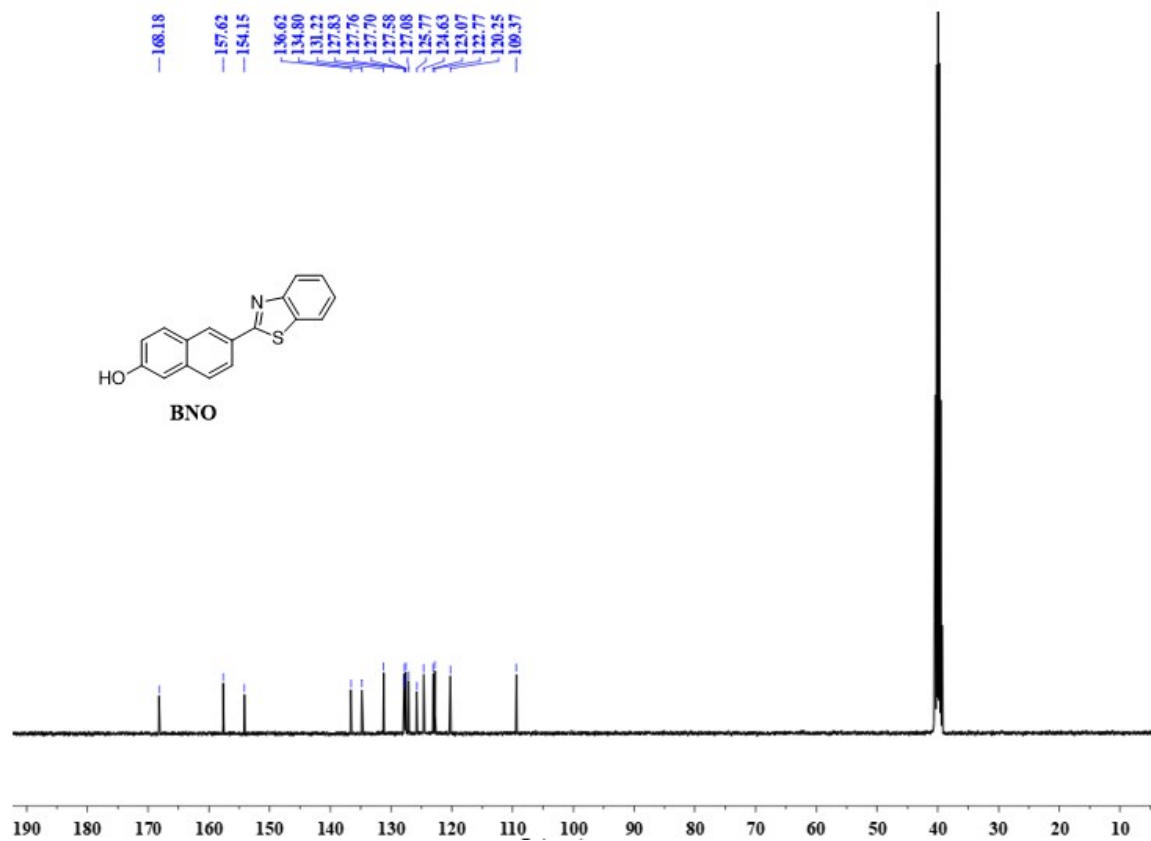

Figure S2. <sup>13</sup>C NMR (100 MHz) spectrum of compound **BNO** in DMSO-*d*<sub>6</sub>.

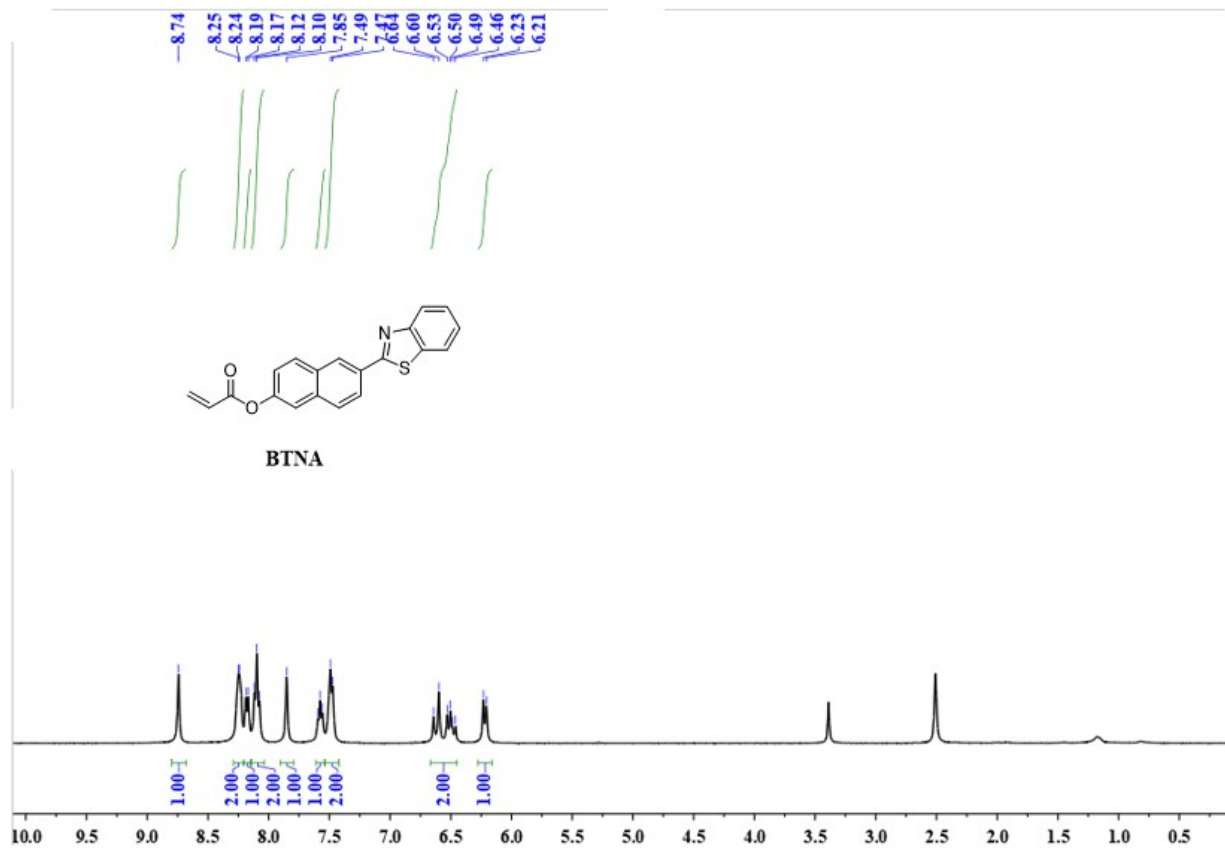

**Figure S3.** <sup>1</sup>H NMR (400 MHz) spectrum of probe BTNA in DMSO-*d*<sub>6</sub>.

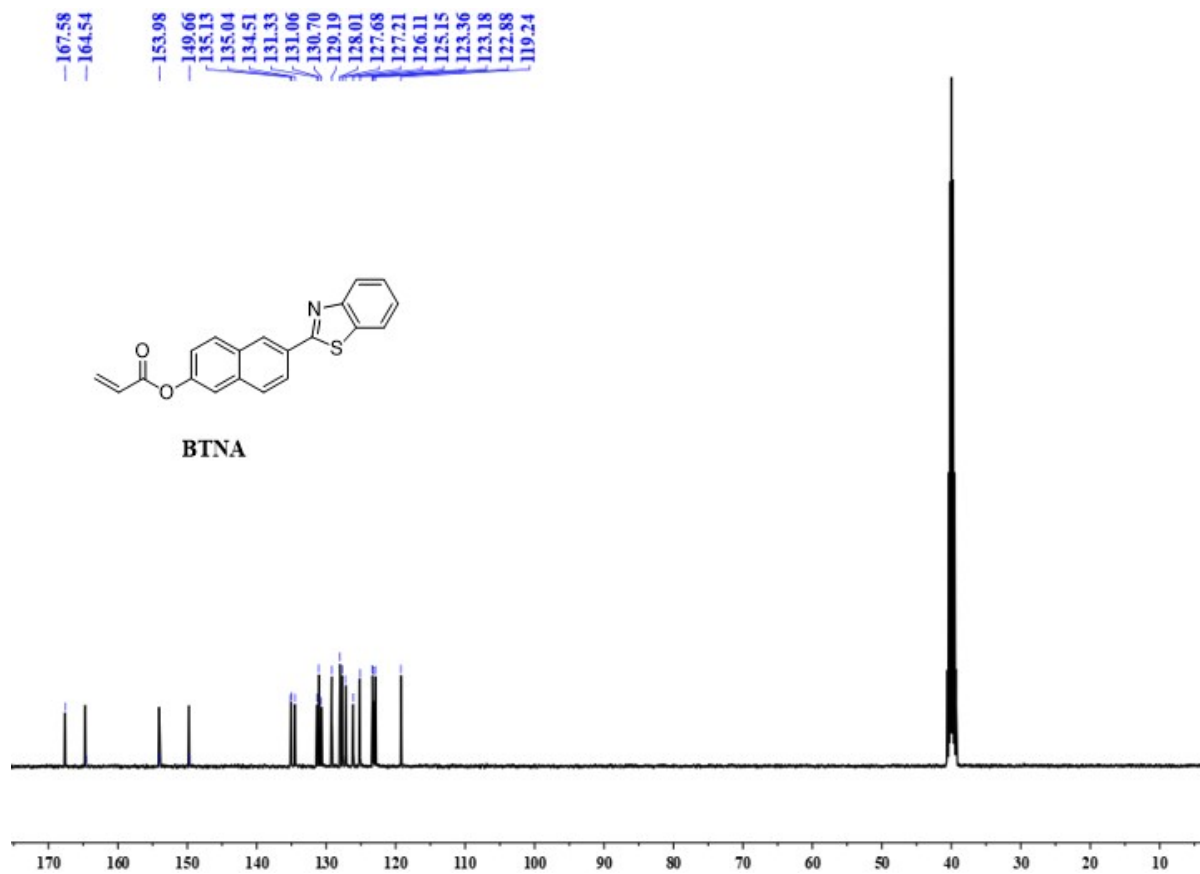

**Figure S4.** <sup>13</sup>C NMR (100 MHz) spectrum of probe BTNA in DMSO-*d*<sub>6</sub>.

## Mass Spectrum SmartFormula Report

### Analysis Info

Analysis Name D:\Data\teachers\C32H45N5O7S\_000001.d  
Method 20180105\_4M@Pos\_lhl  
Sample Name  
Comment  
Operator  
Instrument solariX

### Acquisition Parameter

|                          |            |                   |     |                       |                          |
|--------------------------|------------|-------------------|-----|-----------------------|--------------------------|
| Polarity                 | Positive   | n/a               | n/a | No. of Laser Shots    | 200                      |
| n/a                      | n/a        | No. of Cell Fills | 1   | Laser Power           | 20.0 lp                  |
| Broadband Low Mass       | 101.1 m/z  | n/a               | n/a | n/a                   | n/a                      |
| Broadband High Mass      | 1500.0 m/z | n/a               | n/a | n/a                   | n/a                      |
| Acquisition Mode         | Single MS  | n/a               | n/a | Calibration Date      | Fri Jan 5 11:24:10 2018  |
| Pulse Program            | basic      | n/a               | n/a | Data Acquisition Size | 4194304                  |
| Source Accumulation      | 0.050 sec  | n/a               | n/a | Apodization           | Sine-Bell Multiplication |
| Ion Accumulation Time    | 0.050 sec  | n/a               | n/a |                       |                          |
| Flight Time to Acq. Cell | 0.001 sec  |                   |     |                       |                          |

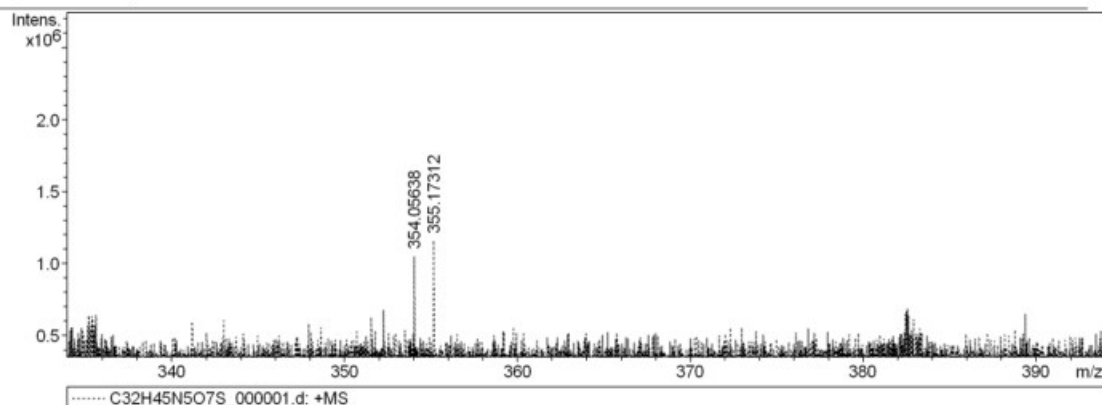

Meas. m/z # Formula Score m/z err [ppm] Mean err [ppm] mSigma rdb e<sup>-</sup> Conf N-Rule

**Figure S5.** HRMS (ESI<sup>+</sup>) spectrum of probe BTNA.

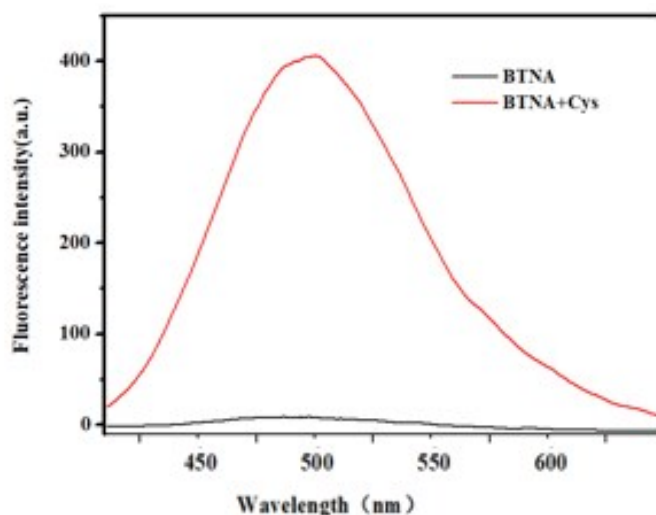

**Figure S6.** Fluorescence spectra of BTNA by itself (10  $\mu$ M, black line), and BTNA (10  $\mu$ M) in the presence of Cys (1 mM, red line). Ex=365 nm.

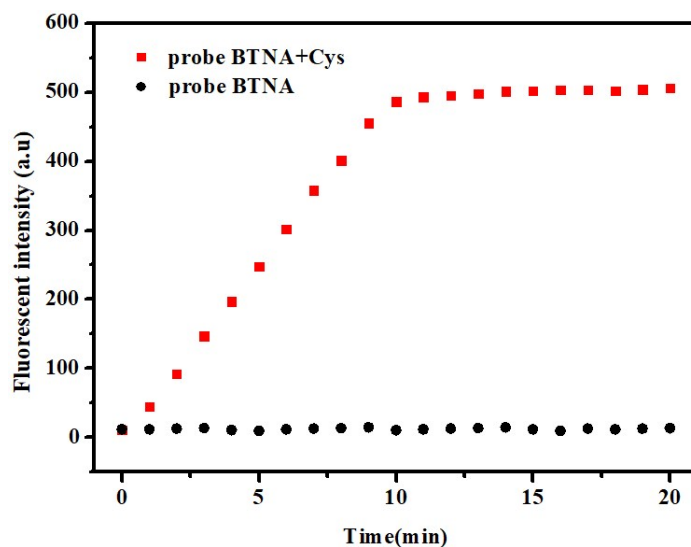

**Figure S7.** Time-dependent fluorescence intensity of **BTNA** (10  $\mu$ M) at 511 nm in the absence and presence of **Cys** (60  $\mu$ M) in PBS buffer (50% DMSO) solution. Ex=365 nm.

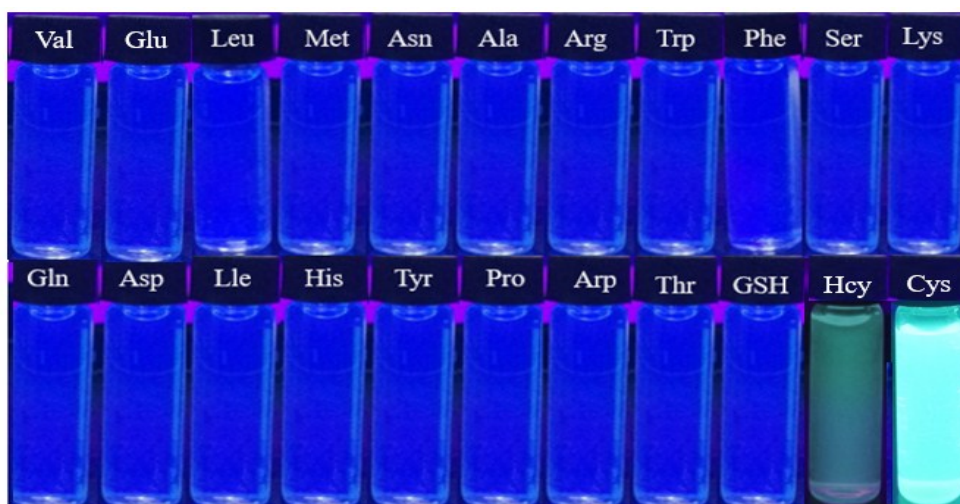

**Figure S8.** Emission color changes of probe **BTNA** with various analytes.





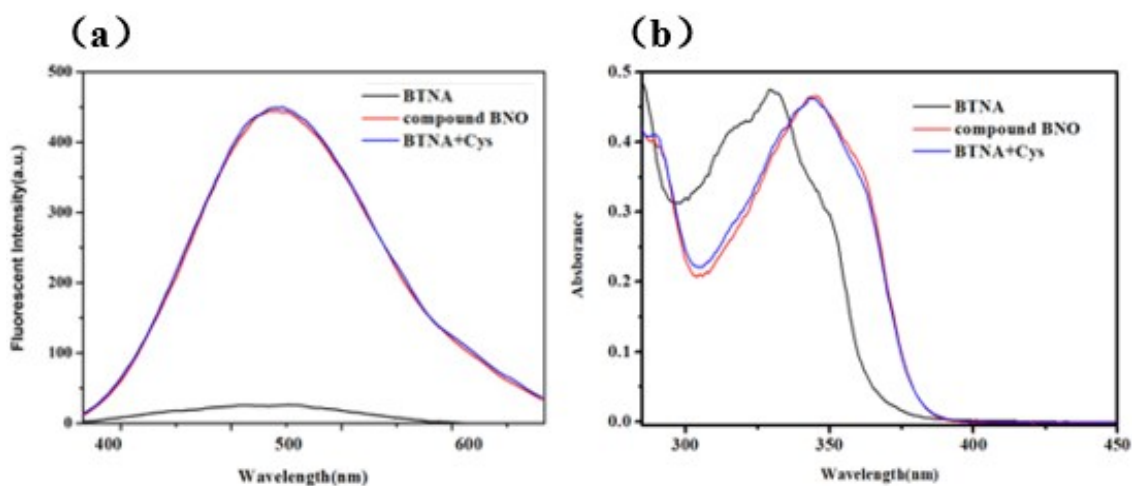

**Figure S11.** A comparison of (a) fluorescent spectra and (b) absorbance spectra of probe **BTNA** (10  $\mu\text{M}$ ), compound **BNO** (10  $\mu\text{M}$ ), and the mixture of probe **BTNA** (10  $\mu\text{M}$ ) + Cys (50  $\mu\text{M}$ ) after 15 min in PBS buffer (50% DMSO) solution.

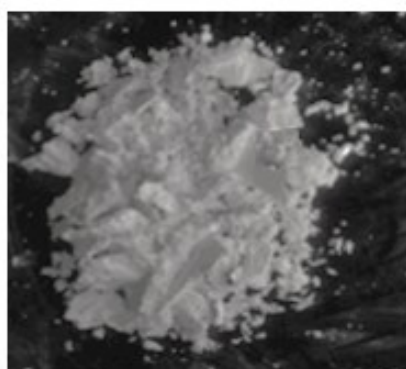

**BNO under room light**

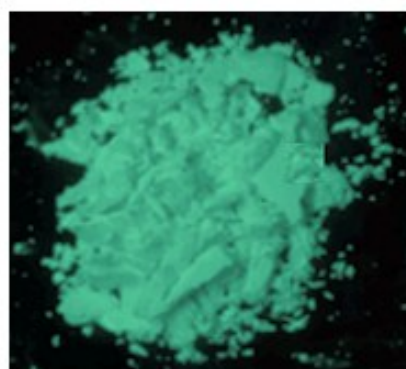

**BNO under light of 365 nm**

**Figure S12.** The color of solid compound **BNO** under room light and UV light.

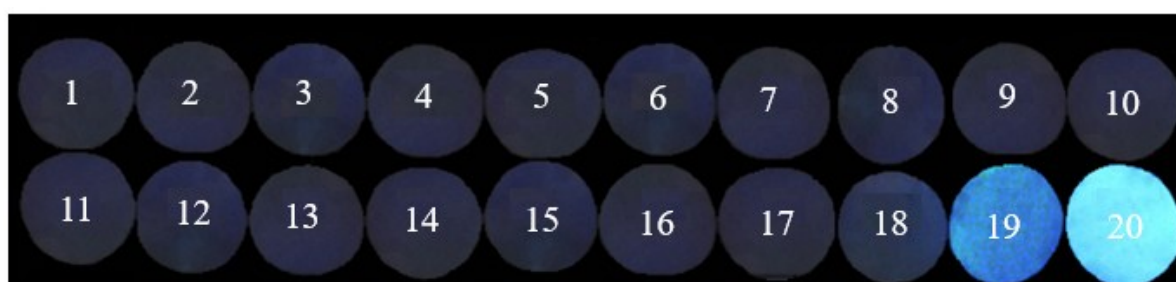

**Figure S13.** Fluorescence changes in test paper (under a 365 nm UV lamp) with probe **BTNA** upon addition of some representative analytes (1. none, 2. Ala, 3. Arg, 4. Asn, 5. Asp, 6. Gln, 7. Glu, 8. His, 9. HIE, 10. Leu, 11. Lys, 12. Met, 13. Phe, 14. Pro, 15. Ser, 16. Trp, 17. Tyr, 18. GSH, 19. Hcy, 20. Cys. Except GSH were used 1mM, others were used 200  $\mu\text{M}$  for the test).

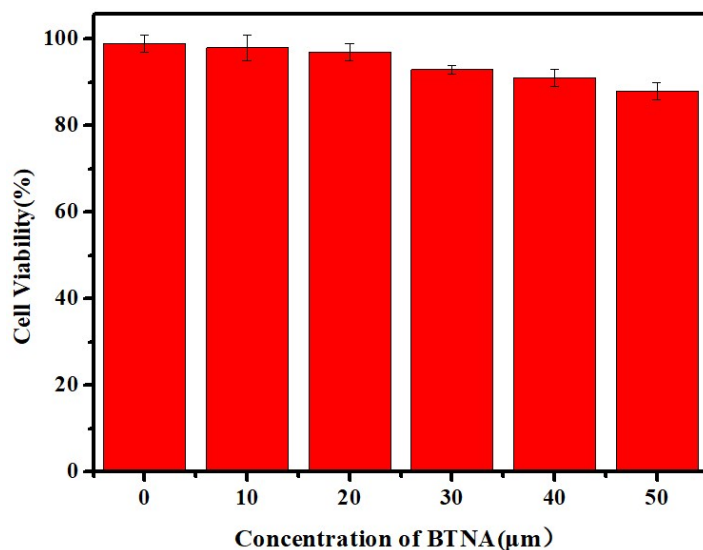

**Figure S14.** Cell viability to HeLa cells of probe **BTNA**.

## References

- [1] Haiyan Zhang, Weiyong Feng, Guoqiang Feng, A simple and readily available fluorescent turn-on probe for cysteine detection and bioimaging in living cells, *Dyes and Pigments*. 139 (2017) 73-78.
- [2] Liguang Wang, Qi Zhou, Baocun Zhu, Lianguo Yan, Zhenmin Ma, Bin Du, Xiaoling Zhang, A colorimetric and fluorescent chemodosimeter for discriminative and simultaneous quantification of cysteine and homocysteine, *Dyes and Pigments*. 95 (2012) 275-279.
- [3] Jinmin Shi, Yujiao Wang, Xiaoliang Tang, Wei Liu, Huie Jiang, Wei Dou, Weisheng Liu. A colorimetric and fluorescent probe for thiols based on 1, 8-naphthalimide and its application for bioimaging, *Dyes and Pigments*. 100 (2014) 255—260.
- [4] Wenlong Fan, Ximing Huang, Xiaomin Shi, Zhuo Wang, Zhengliang Lu, Chunhua Fan, Qibing Bo. A simple fluorescent probe for sensing cysteine over homocysteine and glutathione based on PET, *Spectrochimica Acta Part A: Molecular and Biomolecular Spectroscopy*. 173 (2017) 918–923.
- [5] Yuchen Liao, Paribthan, Lingfang Wei, Shupao Wu. A coumarin-based fluorescent probe for

- thiols and its application in cell imaging. *Sensors and Actuators B*.332 (2016) 732-737
- [6] De huan Yu, Qiong Zhang, Shuangshuang Ding and Guoqiang Feng, A colorimetric and near-infrared fluorescent probe for biothiols and its application in living cells, *RSC Adv.* 4 (2014) 46–61.
- [7] Ji Ting, Hou Jin Yang, Kun Li, Kang Yu, Xiao Qi Yu. A colorimetric and red emissive fluorescent probe for cysteine and its application in bioimaging, *Sensors and Actuators B Chem.* 214 (2017) 92-100.
- [8] Shengqing Wang, Qinghua Wu, Haoyang Wang, Junying Miao, Baoxiang Zhao. Novel pyrazoline-based fluorescent probe for detecting glutathione and its application in cells. *Biosensors and Bioelectronics.* 55 (2014) 386-390.
- [9] Xiaofeng Yang, Yixing Guo, Robert M, Strongin. Conjugate addition/cyclization sequence enables selective and simultaneous fluorescence detection of cysteine and homocysteine. *Angew Chem Int Ed Engl.* 50 (2011) 10690-10693.
- [10] Xi Dai, Qing Hua Wu, Peng-Chong Wang, Jie Tian, Yu Xu, Sheng Qing Wang, Jun Ying Miao, Baoxiang Zhao. A simple and effective coumarin-based fluorescent probe for cysteine, *Biosensors and Bioelectronics* 59 (2014) 35–39.
- [11] Qiong Zhang, Dehuan Yu, Shuangshuang Ding and Guoqiang Feng. A colorimetric and red emissive fluorescent probe for cysteine and its application in bioimaging. *50* (2014) 14002-14005.
